# Supplementary material for: Dielectric and photoluminescence properties of a layered perovskite-type organic–inorganic hybrid phase transition compound: NH3(CH2)5NH3MnCl4
Source: Royal Society of Chemistry journal article supplement (doi:10.1039/c5tc04114g), 2016-01-01
Supplement: c5tc04114g1.pdf [file c5tc04114g1.pdf]

## Supporting Information

**Dielectric and photoluminescence properties in a layered  
perovskite-type organic-inorganic hybrid phase transition  
compound:  $\text{NH}_3(\text{CH}_2)_5\text{NH}_3\text{MnCl}_4$**

**Xing-Hui Lv, Wei-Qiang Liao, Peng-Fei Li, Zhong-Xia Wang, Chen-  
Yu Mao and Yi Zhang\***

**Ordered Matter Science Research Center, College of Chemistry and Chemical  
Engineering, Southeast University, Nanjing 211189, PR China  
\*E-mail: yizhang1980@seu.edu.cn.**

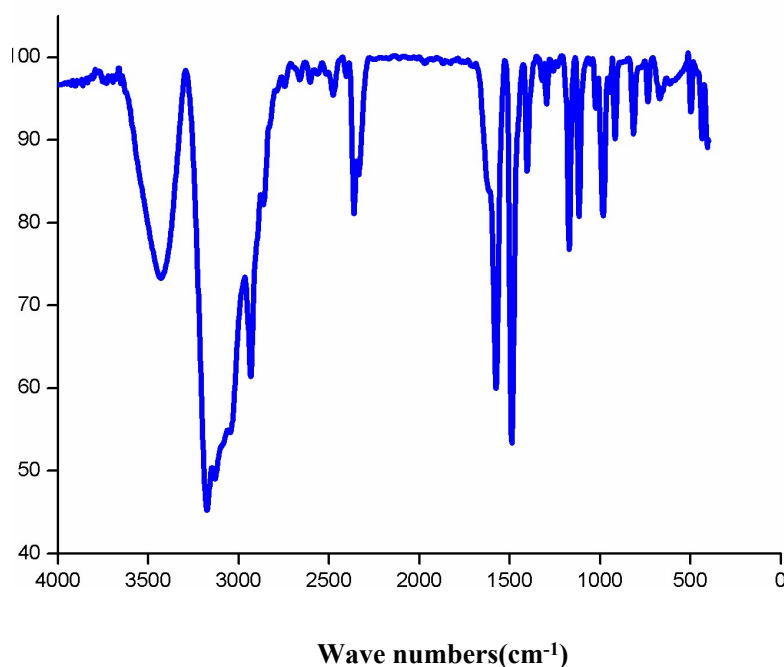

**Fig. S1** Infrared (IR) spectra of solid **1** in KBr pellet recorded on a Shimadzu model IR-60 spectrometer at room temperature.

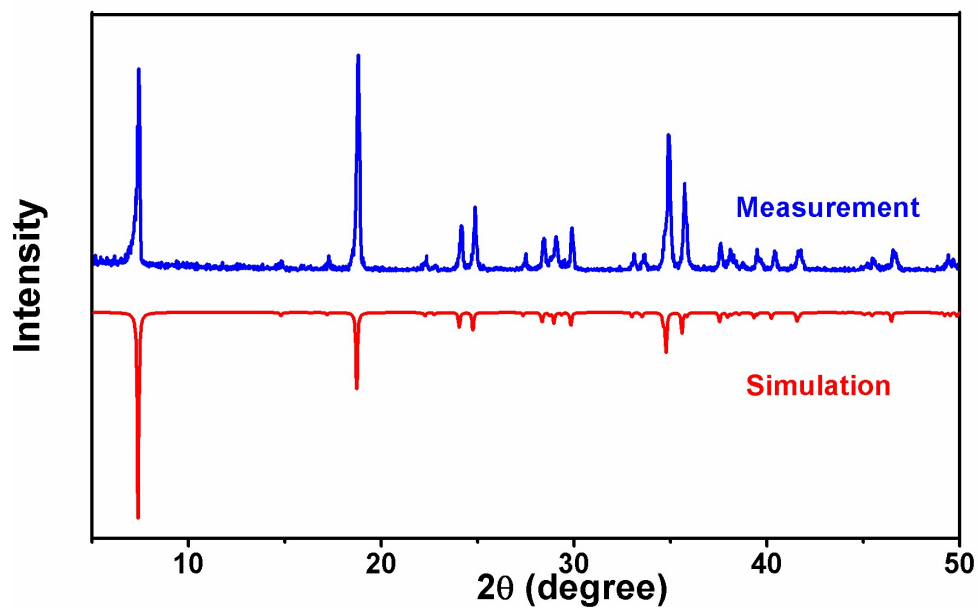

**Fig. S2** Experimental powder diffraction (XRPD) pattern matching very well with the simulated pattern in terms of the crystal structures at room temperature.

**Table S1.** Selected bond lengths [Å] and angles [°] for **1** at 173 and 333 K.

|                  |                     |       |
|------------------|---------------------|-------|
| <b>LTP(173K)</b> | Mn(1)-Cl(2)         | 2.502 |
|                  | Mn(1)-Cl(1)         | 2.591 |
|                  | Cl(1)#3-Mn(1)-Cl(1) | 92.06 |
|                  | Cl(1)#4-Mn(1)-Cl(1) | 87.94 |
|                  | Mn(1)#5-Cl(1)-Mn(1) | 164.8 |
| <b>HTP(333K)</b> | Mn(1)-Cl(2)         | 2.493 |
|                  | Mn(1)-Cl(1)         | 2.592 |
|                  | Cl(1)#2-Mn(1)-Cl(1) | 92.16 |
|                  | Cl(1)-Mn(1)-Cl(1)   | 87.84 |
|                  | Mn(1)-Cl(1)-Mn(1)   | 168.8 |

Symmetry transformations used to generate equivalent atoms:

|                           |                              |                       |
|---------------------------|------------------------------|-----------------------|
| #1 $-x+1, -y+1/2, z;$     | #2 $-x+1/2, -y+1/2, -z+3/2;$ | #3 $x, y+1/2, -z+1$   |
| #4 $-x+1/2, -y+0, z+1/2,$ | #5 $-x+1/2, -y+0, z-1/2$     | #6 $x, -y+3/2, z$     |
| #7 $-x, -y+1, -z+2$       | #8 $-x+1/2, -y+1, z+1/2$     | #9 $x-1/2, y, -z+3/2$ |
| #10 $-x+1/2, -y+1, z-1/2$ |                              |                       |

**Table S2.** Hydrogen-Bond Geometry (Å, deg) for the weak N–H···Cl and C–H···Cl interactions at 173K and 333K in **1**.

|                  | D–H···A             | D···H | H···A | D···A | D–H···A |
|------------------|---------------------|-------|-------|-------|---------|
| <b>LTP(173K)</b> | N(1)-H(1E) ...Cl(2) | 0.89  | 2.34  | 3.203 | 164.8   |
|                  | N(1)-H(1D)...Cl(1)  | 0.89  | 2.41  | 3.271 | 161.9   |
|                  | N(1)-H(1C)...Cl(2)  | 0.89  | 2.42  | 3.290 | 165.7   |
|                  | N(1)-H(1C)...Cl(1)  | 0.89  | 2.96  | 3.401 | 112.4   |
|                  | C(1)-H(1B)...Cl(2)  | 0.97  | 2.81  | 3.684 | 150.9   |
|                  | C(1)-H(1A)...Cl(2)  | 0.97  | 2.81  | 3.676 | 149.7   |
| <b>HTP(333K)</b> | N(1)-H(1A)... Cl(1) | 0.900 | 2.615 | 3.459 | 156.5   |
|                  | N(1)-H(1A)... Cl(1) | 0.900 | 2.791 | 3.246 | 112.6   |
|                  | N(1)-H(1C)...Cl(1)  | 0.900 | 2.518 | 3.409 | 156.3   |
|                  | N(1)-H(1C)...Cl(1)  | 0.900 | 2.380 | 3.224 | 128.1   |
|                  | C(1)-H(1D)... Cl(2) | 0.960 | 2.729 | 3.581 | 148.2   |
|                  | C(1)-H(1E)... Cl(2) | 0.943 | 2.835 | 3.699 | 152.9   |

Symmetry transformations used to generate equivalent atoms:

|                             |                          |                          |
|-----------------------------|--------------------------|--------------------------|
| #1 $x, -y+3/2, z$           | #2 $-x, -y+1, -z+2$      | #3 $-x+1/2, -y+1, z+1/2$ |
| #4 $x-1/2, y, -z+3/2$       | #5 $-x+1/2, -y+1, z-1/2$ | #6 $x, y, z-1$           |
| #7 $-x+1/2, -y+1/2, -z+1/2$ |                          | #8 $-x+1/2, -y, z-1/2$   |
| #9 $x, y-1/2, -z+1$         |                          | #10 $x, y+1/2, -z+1$     |
